# Supplementary material for: Identification of platelet subpopulations in cryopreserved platelet components using multi-colour imaging flow cytometry
Source: Springer Nature journal article supplement (doi:10.1038/s41598-023-28352-2), 2023-01-21
Supplement: MOESM1 [file 41598_2023_28352_MOESM1_ESM.pdf]

**Identification of platelet subpopulations in cryopreserved platelet components using multi-colour imaging flow cytometry**

Lacey Johnson<sup>1,2,\*</sup>, Pearl Lei<sup>1,2</sup>, Lauren Waters<sup>1</sup>, Matthew P. Padula<sup>2</sup>, Denese C. Marks<sup>1,3</sup>

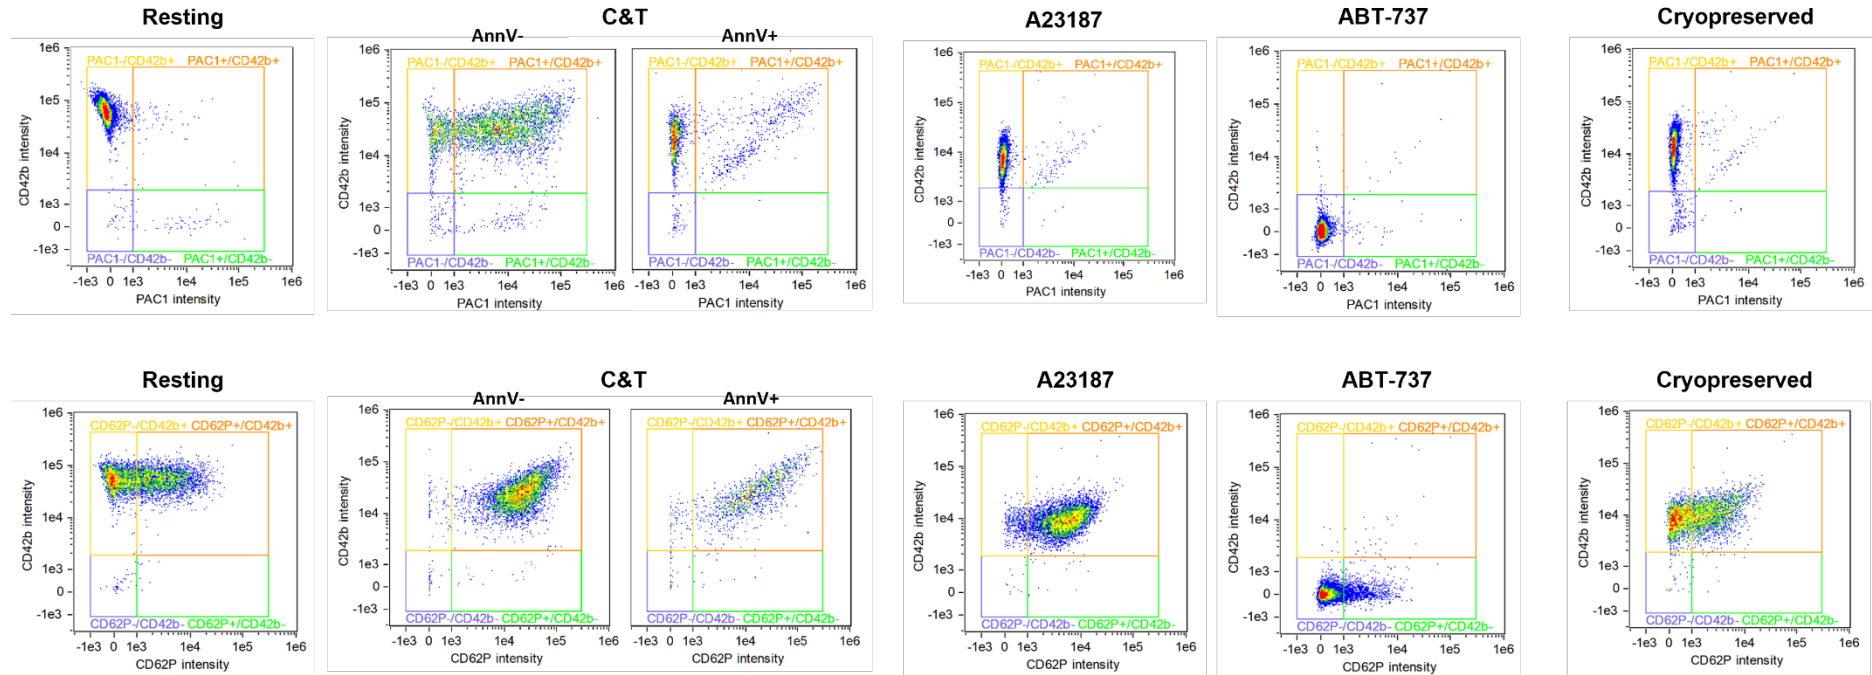

**Supplementary Fig. S1. Representative scatterplots of platelet subpopulations from the five treatment groups.** Fresh components were either unstimulated (resting), or stimulated with collagen and thrombin (C&T), A23187 or ABT-737. Cryopreserved platelet components were thawed and reconstituted in plasma. The platelets were distinguished based on brightfield area and aspect ratio intensity and then the subpopulations were defined based on annexin-V (AnnV), PAC1 and CD42b (upper panels) and annexin-V, CD62P and CD42b (lower panels). Representative images of the fluorescence profile of platelet population in the treatment groups are presented.

**Supplementary Table S1. Time course of phenotype following ABT-737 stimulation.**

| ABT-737 treatment | % subpopulations                         |                                          |                                          |                                          |                                          |                                          |                                          |                                          |
|-------------------|------------------------------------------|------------------------------------------|------------------------------------------|------------------------------------------|------------------------------------------|------------------------------------------|------------------------------------------|------------------------------------------|
|                   | AnnV-                                    |                                          |                                          |                                          | AnnV+                                    |                                          |                                          |                                          |
|                   | CD42b <sup>+</sup><br>CD62P <sup>-</sup> | CD42b <sup>+</sup><br>CD62P <sup>+</sup> | CD42b <sup>-</sup><br>CD62P <sup>-</sup> | CD42b <sup>-</sup><br>CD62P <sup>+</sup> | CD42b <sup>+</sup><br>CD62P <sup>-</sup> | CD42b <sup>+</sup><br>CD62P <sup>+</sup> | CD42b <sup>-</sup><br>CD62P <sup>-</sup> | CD42b <sup>-</sup><br>CD62P <sup>+</sup> |
| 2 hours           | 0.4                                      | 0.2                                      | 5.7                                      | 1.7                                      | 1.8                                      | 2.4                                      | 70.2                                     | 17.2                                     |
| 4 hours           | 0.2                                      | 0.0                                      | 1.4                                      | 0.4                                      | 0.2                                      | 0.2                                      | 90.3                                     | 7.1                                      |
| Subpopulation     | <b>Resting</b>                           | <b>Aggregatory</b>                       | N/A                                      | N/A                                      | <b>Novel</b>                             | <b>Procoagulant</b>                      | <b>Apoptotic</b>                         | N/A                                      |

Shaded cells indicate the dominant phenotype(s) within the treatment group

N/A indicates a minority phenotype not associated with a subpopulation

Novel indicates a phenotype not aligned with the known subpopulations

**Supplementary Table S2. Antibodies and dyes used for imaging flow cytometry**

| <b>Antibody/dye</b> | <b>Target</b>                              | <b>Manufacturer</b>               | <b>Catalogue number</b> | <b>Clone</b> | <b>Stock concentration</b> | <b>Dilution prior to adding to staining tube</b> | <b>Volume added to 50 µL staining tube (µL)</b> |
|---------------------|--------------------------------------------|-----------------------------------|-------------------------|--------------|----------------------------|--------------------------------------------------|-------------------------------------------------|
| Annexin-V-APC       | Phosphatidylserine externalisation         | Biolegend, San Diego, CA, USA     | 640941                  | N/A          | 8 µg/mL                    | N/A                                              | 1                                               |
| CD61-FITC           | GPIIIa (surface glycoprotein)              | Dako, Glostrup, Denmark           | F0803                   | Y2/51        | 0.1 µg/mL                  | 1/20                                             | 1                                               |
| CD41/CD61-FITC      | Activated GPIIb/IIIa (activation marker)   | BD Biosciences, San Jose, CA, USA | 340507                  | PAC-1        | 25 µg/mL                   | N/A                                              | 1                                               |
| CD42b-PE            | GPIbα (surface glycoprotein)               | BD Biosciences, San Jose, CA, USA | 555473                  | HIP1         | 25 µg/mL                   | N/A                                              | 1                                               |
| GPVI-PE             | GPVI (surface glycoprotein)                | BD Biosciences, San Jose, CA, USA | 565241                  | HY101        | 50 µg/mL                   | 1/2                                              | 1                                               |
| CD62P-FITC          | Exposed P-selectin (activation marker)     | BD Biosciences, San Jose, CA, USA | 550866                  | AC1.2        | 50 µg/mL                   | N/A                                              | 1                                               |
| TMRE                | Mitochondrial membrane polarisation status | Abcam, Cambridge, United Kingdom  | ab113852                | N/A          | 1 mM                       | 1/200                                            | 1                                               |

Abbreviations: allophycocyanin (APC); fluorescein isothiocyanate (FITC); no dilution was performed (N/A); phycoerythrin (PE); tetramethylrhodamine ethyl ester (TMRE).
